# Supplementary material for: Case Report: Recurrent Malignant Struma Ovarii With Hyperthyroidism and Metastases, A Rare Case Report and Review of the Literature
Source: Pathol Oncol Res. 2022 May 10;28:1610221. doi: 10.3389/pore.2022.1610221 (PMC9127674; doi:10.3389/pore.2022.1610221)
Supplement: Supplementary file 1 [file Table3.XLSX]

## Sheet: Sheet1
ID	age0 unknow	location11;22;3both;4left fallopian tube;5 both salpingo	size(mm);0unknown	histology 1 papillary; 2 follicular; 0 unknown;3 f variant p;4 mixed Brenner tumor;5 micro f; 6 micro2; 7 Hurthle cell; 8 1 microcarcinoma; 9 micro- and macro2; 10 adenoma; 11 adenomatous changes and carcinoid; 13 normo2 and macro2; 14 mixed 1 and 2; 15 normo2 and macrofollicuar; 16 Macro2 and micro2; 17 Clear cell carcinoma; 18 2 carcinoma with poor differentiation; 19 mixed micro2 and macro2; 2…	other symptom 0 none;1 yes; 999 unknown	abdominal discomfort 0 no; 1 yes; 999 unknown	weight loss 0 no; 1 yes; 999 unknown	abnormal genital bleeding 0 no; 1 yes; 999 unknown	urinary compressive symptoms 0 no; 1 yes; 999 unknown	hypertthyroidsim 0 no; 1 yes; 999 unknown	CA-125 0 normal; 1 abnormal; 999 unknown	Tg (thyroglobulin) 0 normal; 1 abnormal; 999 unknown	salpingo-oophorectomy 0 no; 1 unilateral; 2 bilateral; 999 unknown; 888 N/A	pelvic washing 0 no; 1 yes; 999 unknown; 888 N/A	hysterectomy 0 no; 1 yes; 999 unknown; 888 N/A	omentectomy 0 no; 1 yes; 999 unknown; 888 N/A	other 0 no; 1 yes; 999 unknown; 888 N/A	Total thyroidectomy 0 no; 1 yes; 999 unknown; 888 N/A	131I 0 no; 1 yes; 999 unknown; 888 N/A	metasasis 0 no; 1 yes; 999 unknown; 888 N/A	recurrence 0 no; 1 yes; 999 unknown; 888 N/A	follow-up time (month) 999 unknown; 888 NA; 0 benign; 1 malignant; 999 unknown	note
1	55	1	110	1	9	0	0	0	0	0	65	999	1	1	0	0	0	1	0	0	999	6	1
2	48	1	100	1	9	0	0	0	0	1	999	464.00	888	999	888	999	999	1	1	1	999	2	1
3	39	0	40	2	999	999	999	999	0	0	999	999	1	0	1	1	0	1	1	999	999	24	1
4	49	1	50	2	1	1	0	0	0	999	999	120	1	0	0	0	1	1	1	0	0	30	1
5	73	1	120	0	1	0	1	0	0	1	999	0	0	0	1	0	1	0	0	999	0	60	999
6	43	2	50	4	1	0	0	1	0	999	999	999	999	999	999	999	999	0	0	999	0	12	0
7	50	1	40	2	0	1	0	0	0	999	878.67	999	2	0	0	0	0	0	0	0	0	10	0
8	38	2	40	2	0	1	0	0	0	1	0	999	1	0	0	0	0	0	0	999	999	999	0
9	35	2	120	5	1	1	0	0	1	1	999	999	1	0	888	0	0	888		999	999	999	999
10	26	1	160	0	0	1	0	0	0	0	999	999	1	0	0	1	0	0	0	999	999	999	0
11	55	1	0	0	999	999	999	999	999	999	0	999	2	0	1	0	0			999	999	999	999
12	71	2	0	0	0	0	0	0	0	999	0	999	999	999	999	999	999	999	999	999	999	999	999
13	43	2	0	0	999	999	999	999	999	999	59.9	999	999	999	999	999	999	999	999	999	999	999	999
14	38	1	24	1	999	999	999	999	999	0	999	999	888	0	0	0	1	0	0	999	999	999	1
15	22	2	160	1	0	0	0	0	1	999	999	999	1	0	0	0	0	1	1	999	999	999	0
16	58	2	40	1	0	1	0	0	0	999	999	999	999	999	999	999	999	999	999	999	999	999	1
17	47	2	150	2	0	1	0	0	0	999	999	999	2	0	1	0	1	0	0	0	999	999	999
18	48	2	80	0	1	0	0	0	0	999	999	999	0	0	0	0	1	0	0	999	0	12	999
19	55	2	30	0	1	1	0	1	0	0	120	999	999	999	999	999	999	999	888	0	999	999	999
20	65	2	50	0	1	0	0	0	0	0	402	999	999	999	999	999	999	999	999	0	0	4	0
21	52	2	130	0	0	1	0	0	0	0	999	0	2	0	1	0	1	1	1	1	0	24	1
22	59	2	60	0	1	1	0	0	0	0	999	999	1	0	0	0	0	999	999	0	0	60	999
23	27	1	112	0	999	999	999	999	999	999	67	999	999	999	999	999	999	999	999	999	999	999	0
24	44	1	70	0	999	999	999	999	999	0	0	0	999	999	999	999	999	0	0	999	999	999	999
25	44	0	180	0	999	999	999	999	999	0	54	0	999	999	999	999	999	999	999	999	999	999	999
26	57	2	59	3	999	999	999	999	999	999	999	339	2	0	0	0	0	1	1	888	888	999	0
27	38	2	40	3	1	0	0	1	0	999	999	999	2	0	0	0	0	1	1	999	999	999	1
28	69	2	140	0	1	1	1	0	0	1	1	999	2	0	1	0	0			0	0	3	0
29	41	1	100	1	1	1	0	0	0	0	41.3	999	2	0	1	0	0	1	1	0	0	6	1
30	69	2	80	2	0	0	0	0	0	999	999	999	2	0	1	1	1	0	0	888	888	999	0
31	50	1	100	0	1	1	0	0	0	999	1237	999	1	0	1	0	0	999	0	999	0	6	0
32	55	1	60	0	1	1	0	0	0	999	258	999	1	0	0	0	0	0	0	0	0	6	1
33	17	1	170	3	1	0	0	0	0	0	17.3	1	1	0	0	0	0	1	1	999	0	48	1
34	10	2	113	2	0	1	0	1	0	1	999	999	1	0	0	0	0	1	1	1	0	8	999
35	77	2	90	2	1	0	0	0	0	999	521	999	2	0	1	1	1			0	999	999	0
36	17	2	200	0	0	1	0	0	0	1	999	999	1	0	0	0	0	0	0	0	999	999	0
37	57	2	130	2	0	0	0	1	0		999	999	2	0	1	1	1	0	0	999	999	999	999
38	55	1	230	6	1	0	0	0	0	1	3803	999	2	0	1	1	0	0	0	999	0	2	0
39	45	1	120	2	1	0	0	0	0	999	999	999	1	0	0	0	0	0	0	1	0	288	1
40	61	1	49	0	0	0	0	0	0	1	999	999	2	0	0	0	0	0	0	999	999	999	999
41	26	1	160	2	0	0	0	0	0	0	999	450	0	0	0	0	1	0	0	999	0	20	0
42	56	1	66	7	0	1	0	0	0	0	5218	999	1	0	1	1	0	888	0	0	0	4	0
43	46	2	70	0	999	999	999	999	999	0	0	999	2	0	1	0	0	0	0	999	0	48	999
44	32	2	60	1	0	0	0	0	0	0	999	108.5	1	0	0	1	1	1	1	0	0	12	1
45	46	2	50	1	0	1	0	0	0	999	999	0	1	0	1	1	1	1	1	0	0	12	1
46	27	2	80	1	0	1	0	0	0	999	39	999	0	0	0	0	0	999	999	999	0	8	0
47	68	2	120	1	0	1	0	0	0	0	41	999	1	0	1	0	1	1	0	1	999	999	1
48	56	2	80	0	0	0	0	0	0	1	48.55	999	2	0	1	0	0	1	0	999	999	999	0
49	49	2	73	2	0	1	0	0	0	0	999	999	999	0	0	0	1	0	0	999	0	4	999
50	31	2	100	2	0	1	0	0	0	0	999	999	0	0	0	0	1	0	0	999	999	999	0
51	78	2	100	1	0	1	1	0	0	0	0	0	1	0	0	0	0	0	0	0	0	999	999
52	70	1	120	0	0	0	0	0	0	0	12.1	999	2	0	1	1	1	0	0	1	999	999	0
53	35	1	80	0	0	1	0	0	0	999	61.57	999	0	0	0	0	0	0	999	999	999	999	0
54	50	1	80	0	1	1	0	0	0	999	43.9	999	2	0	1	1	1	0	0	999	999	999	0
55	52	2	60	0	0	0	0	0	0	999	999	999	2	0	1	0	0	0	0	999	0	24	999
56	14	2	100	0	0	1	0	0	0	0	0	999	0	0	0	0	1	0	0	0	0	12	999
57	50	1	350	8	1	1	0	0	0	0	10	999	2	0	1	0	0	0	0	999	999	999	0
58	43	0	0	2	0	0	0	0	0	0	999	121	999	0	0	0	0	1	1	1	0	84	999
59	66	1	120	3	0	1	0	0	0	0	1636	299.8	2	0	1	1	0	0	0	999	0	6	1
60	52	2	70	0	1	0	0	0	0	0	1289	999	1	0	1	0	0	0	0	0	0	2	0
61	42	1	0	3	999	999	999	999	999	999	999	3230	1	0	0	0	0	1	1	1	0	999	1
62	40	2	200	1	0	1	0	0	0	999	999	999	1	0	1	0	0	0	0	0	0	18	1
63	65	1	70	3	0	0	0	1	0	999	999	999	2	0	1	0	0	0	0	999	0	999	1
64	46	2	200	0	1	1	0	0	0	999	1230.9	999	2	0	1	0	0	0	0	0	0	3	0
65	43	1	0	3	999	999	999	999	999	0	999	6.8	0	0	0	0	0	1	1	0	999	999	1
66	75	1	70	0	0	1	0	0	0	0	264	999	2	0	0	1	0	0	0	0	0	6	0
67	49	2	180	3	0	0	0	0	0	1	404.7	999	2	0	1	0	0	1	0	999	999	999	0
68	56	1	150	9	0	0	0	0	0	0	999	999	2	0	1	1	0	0	0	999	999	999	999
69	41	0	0	2	1	1	0	0	0	0	999	23.3	999	999	999	999	999	1	1	999	1	3	1
70	48	1	90	0	0	0	0	0	0	1	999	999	1	0	1	0	1	888	1	0	999	999	999
71	42	1	110	1	0	1	0	0	0	0	251	0	2	0	1	1	0	0	0	1	999	999	999
72	64	0	0	1	1	1	0	0	1	999	55	999	2	0	0	0	0	1	999	1	1	999	999
73	38	2	6	2	0	0	0	0	0	0	0	999	888	0	1	1	0	1	1	1	999	999	1
74	72	2	82	1	0	1	0	0	0	999	999	999	2	0	1	0	0	1	0	999	0	12	1
75	52	2	60	3	1	0	0	0	0	0	9.3	999	1	0	1	1	1	0	0	0	0	24	1
76	61	2	70	1	0	0	0	0	0	0	0	999	888	1	0	0	1	0	0	1	0	3	999
77	61	1	230	1	0	1	0	0	0	0	340	999	2	0	1	1	1	0	0	1	0	3	1
78	40	1	110	2	1	1	0	0	0	999	1099	999	2	0	1	1	1	0	0	1	999	999	0
79	60	1	0	0	0	0	0	0	0	1	999	999	2	0	1	0	0	1	888	999	999	999	999
80	55	2	0	1	999	999	999	999	999	999	999	3490	2	1	0	0	0	1	1	999	0	60	999
81	49	2	100	2	1	1	0	0	0	1	56	179.7	888	0	1	0	1	1	1	1	0	7	1
82	71	0	0	2	1	0	0	0	0	0	999	999	999	999	999	999	999	1	1	1	0	18	999
83	72	2	180	2	0	0	0	0	1	999	999	999	2	0	1	1	0	0	0	0	0	36	1
84	40	2	47	3	0	0	0	0	0	0	60	999	1	0	0	0	0	0	0	0	999	12	1
85	25	1	100	1	0	1	0	0	0	0	999	0	1	0	0	0	0	0	0	999	0	6	0
86	40	1	60	0	1	0	0	0	0	1	999	1690	2	0	0	0	0	0	0	999	999	999	999
87	31	2	70	2	0	0	0	0	0	999	999	999	0	0	0	0	1	999	999	999	0	3	0
88	18	1	74	0	1	1	1	0	0	999	999	999	999	999	999	999	999	0	0	999	1	36	1
89	35	2	0	3	999	999	999	999	999	0	999	999	1	0	0	0	1	0	0	0	1	132	1
90	26	2	150	2	0	0	0	0	0	0	999	999	0	0	0	0	1	0	0	999	999	999	0
91	62	2	65	0	0	0	0	0	0	0	999	999	1	0	0	0	0	0	0	999	999	999	999
92	30	2	73	3	0	1	0	0	0	0	999	999	1	0	0	0	0	1	1	1	0	6	999
93	50	1	45	0	0	0	0	0	0	999	7.4	1470	2	0	0	0	0	0	0	999	999	999	999
94	31	2	85	10	999	999	999	999	999	999	19.1	99.5	1	0	0	0	0	0	0	999	999	999	999
95	31	1	60	2	0	0	0	0	0	999	17.2	1350	1	0	0	0	0	0	0	999	999	999	0
96	72	2	90	0	1	0	0	0	0	999	607.4	999	2	0	1	1	0	0	0	0	0	12	0
97	50	2	65	2	0	1	0	0	0	0	999	999	2	0	1	1	1	0	0	0	0	12	999
98	62	2	72	1	1	0	0	0	0	0	999	91	888	999	999	999	999	1	1	0	0	60	1
99	46	2	60	3	0	1	0	0	0	999	1371	999	2	0	1	0	0	0	0	999	0	3	1
100	66	1	100	0	0	1	0	0	0	0	3786	999	0	0	0	0	0	0	0	1	888	888	888
101	78	3	R:100, L:45	0	0	0	0	0	0	1	999	880	2	0	1	0	0	888	0	999	999	999	999
102	41	3	0	2	999	999	999	999	999	999	999	999	0	0	0	0	0	1	1	1	999	999	999
103	15	2	165	2	0	1	0	0	0	999	999	999	1	0	0	0	0	888	888	1	1	3	1
104	28	1	65	0	1	0	1	0	0	1	999	999	0	0	0	0	1	0	0	0	999	999	999
105	49	2	70	1	999	999	999	999	999	0	0	1.7	2	1	0	0	0	0	0	999	0	12	1
106	63	2	80	11	0	1	1	0	0	0	768.1	999	2	0	1	0	0	0	0	999	999	999	999
107	48	2	60	0	0	0	0	0	0	999	14.6	999	1	0	0	0	0	0	0	999	0	18	999
108	83	0	350	0	0	1	0	0	0	1	210	999	0	0	0	0	0	0	0	0	999	999	999
109	38	2	30	2	0	1	0	0	0	0	999	999	0	0	0	0	0	0	0	999	1	36	888
110	31	2	68	2	0	0	0	0	0	1	999	999	1	0	0	0	0	888	1	1	999	6	1
111	42	1	135	1	0	0	0	0	0	999	999	999	2	0	1	0	0	1	1	0	0	12	1
112	35	2	0	2	0	0	0	0	0	999	999	1437	888	0	0	0	1	1	1	1	999	999	1
113	35	1	0	3	0	1	0	0	0	0	42.72	999	1	0	0	0	1	0	0	0	0	999	0
114	60	2	59	1	0	0	0	0	0	0	999	999	2	0	0	0	0	1	1	999	0	24	1
115	33	1	120	0	0	0	0	0	0	999	999	999	1	0	0	0	1	0	0	999	1	60	0
116	67	2	44	3	999	999	999	999	999	0	999	36.2	2	0	0	0	0	1	1	1	999	30	1
117	65	2	60	0	1	0	0	0	0	0	402	999	0	0	0	0	1	0	0	0	0	4	0
118	66	2	70	13	0	1	0	0	0	999	999	999	1	0	0	0	0	0	0	999	0	8	888
119	26	2	0	1	999	999	999	999	999	999	999	999	0	0	0	0	1	0	0	0	0	72	999
120	34	2	175	1	999	999	999	999	999	999	999	999	1	0	0	0	1	0	0	999	0	300	999
121	68	2	40	1	0	0	0	1	0	999	999	999	2	0	1	0	1	0	0	1	888	888	999
122	70	1	110	2	0	0	0	0	0	999	999	1	2	0	1	0	0	1	1	999	888	888	999
123	28	1	135	0	0	0	0	0	0	1	999	999	2	0	1	0	0	888	0	999	999	999	0
124	72	2	290	0	999	999	999	999	999	999	999	999	999	0	0	0	0	888	0	999	999	999	999
125	70	3	75	0	1	1	0	0	0	0	284	999	2	0	1	1	0	0	0	999	0	999	0
126	60	2	170	14	999	999	999	999	999	999	999	999	2	0	1	0	0	1	0	1	888	888	1
127	68	1	50	2	0	0	0	0	0	999	999	999	2	0	0	0	0	0	0	0	0	4	999
128	52	2	200	2	1	1	0	0	0	0	999	999	2	0	1	0	0	888	0	1	0	20	1
129	30	1	130	14	0	1	0	0	0	0	999	999	1	0	0	0	0	0	0	999	0	36	999
130	22	2	50	2	0	1	0	0	0	0	12.4	999	999	0	0	1	1	0	0	999	0	72	1
131	62	2	170	1	0	1	0	0	0	999	999	126	999	999	999	999	999	0	0	999	999	999	999
132	42	2	120	0	1	0	1	0	0	1	2548	999	1	0	1	0	0	888	0	0	0	999	0
133	42	1	150	0	1	1	0	0	0	999	999	999	2	0	1	0	1	0	0	999	999	999	0
134	40	1	70	0	1	0	1	0	0	1	999	999	1	0	0	0	0	0	0	999	999	999	999
135	58	2	50	0	0	0	0	0	0	999	999	999	1	0	0	0	0	0	0	999	999	999	999
136	65	2	120	0	1	1	0	0	0	1	161	999	1	0	0	0	0	0	0	0	0	2	0
137	44	1	80	0	0	1	0	0	0	999	999	999	999	999	999	999	999	999	999	999	999	999	0
138	60	2	0	0	0	1	0	0	0	999	999	999	999	999	999	999	999	999	999	999	999	999	0
139	34	2	90	0	1	1	1	0	0	0	999	999	1	0	0	0	0	0	0	999	0	1.5	999
140	16	2	300	15	0	1	0	0	0	0	999	999	0	0	0	0	1	0	0	0	999	999	999
141	58	0	0	0	0	1	0	0	0	999	999	2800	888	999	999	999	999	1	1	1	0	6	1
142	42	2	120	16	1	0	1	0	0	1	0	999	999	0	0	0	0	888	0	999	0	999	0
143	56	1	0	0	0	0	0	0	0	999	32	999	2	0	0	0	1	0	0	999	999	999	0
144	18	2	35	0	0	0	0	0	0	0	999	999	999	999	999	999	999	0	0	999	999	999	0
145	61	1	0	1	999	999	999	999	999	0	999	999	2	0	1	0	0	0	0	999	0	26	999
146	43	3	40	2	0	1	0	0	0	999	999	999	888	0	0	0	1	0	0	999	0	24	999
147	44	2	50	1	0	0	0	0	0	999	999	999	888	999	999	999	999	0	0	999	0	108	999
148	57	2	0	1	0	0	0	0	0	999	999	999	2	1	1	0	0	0	0	999	0	108	999
149	44	2	24	1	0	0	0	0	0	999	999	999	2	0	1	1	1	1	1	999	0	9	999
150	35	2	160	0	999	999	999	999	999	1	95.1	999	1	0	0	0	0	0	0	999	0	2	0
151	26	2	120	2	999	999	999	999	999	0	999	999	1	0	0	0	0	0	0	0	1	120	0
152	78	1	70	0	0	0	0	0	0	999	164	999	999	999	999	999	999	999	999	999	999	999	0
153	52	2	150	0	1	0	0	0	0	0	149	999	2	0	1	1	0	0	0	0	0	1	0
154	45	1	0	3	1	1	1	0	0	999	0	407000	888	0	1	1	1	1	1	1	888	37	1
155	33	2	150	3	0	1	0	0	1	999	999	999	2	0	1	0	0	0	0	0	1	36	1
156	52	1	150	2	0	0	0	0	0	0	999	999	2	0	0	0	0	1	1	999	0	24	1
157	32	1	80	1	1	1	0	0	0	999	999	999	1	0	0	0	0	1	1	999	0	999	1
158	53	2	22	1	0	0	0	1	0	999	0	999	2	0	0	1	0	0	0	0	999	999	999
159	61	1	0	0	0	0	0	0	0	0	999	603	999	999	999	999	999	999	999	999	999	999	999
160	81	1	150	0	1	0	0	0	0	1	999	999	999	999	999	999	999	0	0	999	999	999	0
161	47	2	50	0	0	0	0	0	0	0	0	0	1	0	1	0	0	0	0	999	999	999	0
162	67	1	100	1	1	1	0	0	0	999	2000	999	2	1	1	0	0	0	0	0	0	24	1
163	52	1	125	2	0	1	0	0	0	999	996	999	2	0	1	1	1	0	0	999	0	12	0
164	48	2	0	0	999	999	999	999	999	999	999	999	0	0	0	0	0	0	0	999	999	999	0
165	31	2	0	1	999	999	999	999	999	0	999	999	999	0	0	0	1	1	1	999	999	999	0
166	19	1	58	0	1	1	0	0	0	0	999	999	0	0	0	0	1	0	0	999	999	999	999
167	32	0	0	0	1	0	0	0	0	999	999	999	888	0	0	0	0	0	0	1	0	36	1
168	21	1	95	1	1	1	0	0	0	999	0	999	1	0	0	0	0	1	0	0	0	999	999
169	24	2	0	0	0	1	0	0	0	0	999	999	1	0	0	0	0	1	1	1	0	3	1
170	62	2	90	0	1	0	0	0	0	0	1621	0	2	1	1	1	0	0	0	999	0	1.4	0
171	34	1	80	3	0	1	0	0	0	0	999	999	1	0	0	0	0	0	0	999	999	888	999
172	48	1	100	1	0	1	0	1	0	999	999	59.4	2	0	1	0	0	0	0	999	0	6	1
173	31	2	65	0	0	1	0	0	0	0	0	999	888	0	0	0	0	0	0	999	999	999	0
174	60	1	75	0	1	1	0	0	0	999	999	999	2	0	0	0	0	0	0	999	999	999	999
175	57	2	70		999	999	999	999	999	1	999	335	2	1	0	0	0	888	1	999	999	999	0
176	31	1	100	0	0	1	0	0	0	0	689	999	999	0	0	0	0	0	0	999	999	999	0
177	59	2	130	17	0	1	0	0	0	999	1300	999	2	0	1	1	0	0	0	999	999	999	999
178	62	1	90		0	1	0	0	0	999	9.8	999	2	0	1	1	0	0	0	999	0	96	999
179	78	2	0	2	0	0	0	0	0	999	999	999	999	0	0	0	0	888	1	999	0	6	0
180	40	2	110	2	0	0	0	0	0	0	0	0	2	0	1	1	0	1	1	999	999	999	1
181	30	2	70	0	1	1	0	0	0	1	999	999	999	999	999	999	999	0	0	999	999	999	999
182	42	2	110	0	1	0	1	0	0	1	2548	999	999	999	999	999	999	888	0	0	0	1.4	0
183	71	1	0	1	0	1	0	0	0	999	999	0	2	0	1	0	1	1	1	1	999	999	1
184	36	1	100	2	0	0	0	0	1	0	999	999	1	1	0	0	0	1	1	1	0	3	1
185	46	0	0	2	1	0	0	0	0	999	999	999	999	999	999	999	999	1	1	1	999	999	1
186	54	1	0	0	1	0	0	0	0	1	999	999	0	0	0	0	1	888	888	999	0	4	0
187	57	2	85	1	1	0	0	0	0	999	999	83	999	0	0	0	1	0	888	999	888	60	0
188	54	2	70	2	0	0	0	1	0	0	999	999	2	0	1	0	0	0	0	999	0	48	999
189	59	1	20	0	0	0	0	0	0	999	999	1528	1	0	0	0	0	999	999	999	999	999	999
190	58	2	105	3	0	1	0	0	0	999	85	999	2	0	1	1	1	1	1	0	999	999	1
191	27	2	0	2	1	0	0	0	0	999	999	999	1	0	0	0	0	0	0	1	1	12	0
192	63	2	30	3	1	0	0	0	0	999	999	500	1	0	0	0	0	888	0	999	999	999	1
193	44	4	2	0	999	999	999	999	999	999	999	999	888	0	1	0	0	0	0	999	0	12	0
194	74	1	130	1	0	1	0	0	0	999	999	999	2	0	1	0	0	0	0	0	1	31	999
195	33	2	25	0	999	999	999	999	999	999	999	999	888	999	999	999	999	0	0	999	999	999	999
196	47	1	200	0	999	999	999	999	999	999	999	1000	2	0	1	0	0	1	1	999	1	999	1
197	38	1	100	3	0	1	0	0	0	0	999	999	2	0	1	1	0	0	0	999	0	24	1
198	41	1	100	2	0	1	0	0	0	999	999	999	999	999	999	999	999	0	0	1	1	12	0
199	36	0	0	18	0	0	0	0	0	999	999	28890	0	0	0	0	1	1	1	1	0	48	999
200	60	2	100	0	999	999	999	999	999	0	224	0	2	0	1	1	0	0	0	999	999	999	0
201	77	1	100	0	999	999	999	999	999	999	2860	999	2	0	1	0	0	0	0	0	999	999	0
202	46	1	200	2	1	1	0	0	0	0	999	1	999	999	999	999	999	1	1	1	999	999	999
203	44	2	70	1	999	999	999	999	999	999	999	674	1	0	0	0	0	888	888	0	0	53	999
204	37	2	76	0	999	999	999	999	999	1	999	999	999	0	0	0	0	888	888	999	999	999	0
205	40	2	50	0	0	1	0	0	0	1	999	999	999	999	999	999	999	0	0	999	0	24	999
206	63	1	140	0	1	0	0	0	0	999	999	999	0	0	0	0	1	0	0	999	999	999	0
207	71	2	46	19	0	0	0	0	0	999	999	1	2	1	1	0	0	888	888	0	999	999	0
208	65	1	60	0	1	1	0	0	0	999	1421	999	2	0	1	1	0	0	0	0	0	6	0
209	44	1	0	3	1	1	1	0	0	1	999	999	2	0	1	0	0	1	1	0	999	999	1
210	61	1	0	0	999	999	999	999	999	999	900	999	999	999	888	999	999	0	0	999	999	999	999
211	40	2	170	20	0	1	0	0	0	999	999	999	0	0	0	0	1	0	0	999	0	6	1
212	54	2	150	1	999	999	999	999	999	0	999	0	2	0	1	0	0	0	0	0	999	999	1
213	32	2	140	2	0	1	0	0	0	999	0	999	2	0	1	1	1	0	0	0	0	12	999
214	70	1	0	21	0	0	0	0	0	999	999	101.5	888	0	888	1	0	1	1	1	0	4	999
215	52	1	90	0	0	1	0	0	0	999	1891	999	2	0	1	1	1	999	999	0	999	999	999
216	79	1	90	21	0	0	0	0	0	999	81	999	2	0	1	0	0	999	999	999	0	6	999
217	62	2	150	21	1	0	0	1	0	999	999	999	2	0	1	0	0	0	0	999	999	999	999
218	70	2	140	1	1	0	0	0	0	999	999	999	2	0	1	1	0	0	0	999	888	8	999
219	50	0	180	0	1	0	0	0	0	999	57	999	999	999	999	999	999	999	999	999	999	999	999
220	42	1	100	0	0	1	0	0	1	999	0	999	999	999	999	999	999	999	999	999	999	999	999
221	26	2	25	22	0	0	0	0	0	999	999	999	2	0	0	0	0	0	0	999	0	24	999
222	41	1	33	2	999	999	999	999	999	999	999	999	2	0	0	0	0	888	1	999	0	8	0
223	38	0	0	3	999	999	999	999	999	999	999	999	999	999	999	999	999	999	999	999	999	999	999
224	74	2	85	3	999	999	999	999	999	999	999	999	2	0	1	1	1	0	0	999	999	999	1
225	15	2	999	999	999	1	0	0	0	999	999	999	1	0	0	0	0	0	0	999	1	144	0
226	35		170	999	1	0	0	0	1	999	999	999	2	0	1	1	0	0	0	999	999	999	0
227	35	1	90	1	0	1	0	0	0	999	999	999	2	0	1	1	0	0	1	1	1	324	1
228	35	1	150	23	1	1	0	0	0	0	0	10	2	0	1	0	0	0	0	999	999	999	1
229	42	1	100	2	0	1	0	0	0	999	999	5	1	0	0	0	1	888	1	1	0	12	1
230	37	1	110	1	0	1	0	0	0	0	999	999	2	0	1	1	1	0	1	1	1	54	1
231	60	5	170,60	1	0	0	0	0	0	0	999	999	2	0	1	0	0	1	1	1	1	888	888
232	34	2	40	1	1	0	0	0	0	0	0	0	1	0	0	1	1	0	0	0	0	999	1
233	55	2	120	0	1	1	0	0	0	999	999	999	2	0	1	1	0	0	0	999	0	36	999
234	24	2	130	2	1	1	0	0	0	0	999	75000	1	0	0	1	1	1	1	1	999	3	1
235	28	0	70	2	0	0	0	0	0	999	999	999	0	0	0	0	1	0	0	1	1	999	1
236	32	1	55	1	0	0	0	0	0	999	0	999	1	1	0	1	1	0	0	0	0	24	1
237	50	2	150	2	0	0	0	1	0	999	999	1	1	0	1	1	1	1	1	1	0	72	1
238	43	2	90	2	0	0	0	0	0	999	999	0	0	0	0	0	1	0	0	1	888	4	1
239	42	1	80	1	0	1	0	0	0	0	999	224	1	0	1	0	0	0	1	0	0	12	1
240	28	2	110	1	0	1	0	0	0	0	999	0	1	1	1	1	1	1	1	1	1	48	1
241	39	2	80	1	0	1	0	0	0	0	999	5966	2	0	1	1	0	1	1	1	1	888	1
242	50	1	70	1	1	0	1	0	0	1	0	1000	2	0	1	0	1		0	0	0	999	1
243	80	2	70	1	0	0	0	0	0	999	129.3	999	0	0	0	0	1	0	0	999	0	21	1
244	48	1	120	1	1	0	0	0	0	1	0	880	2	1	1	1	1	0	0	0	0	36	1
245	42	2	120	0	1	0	0	0	0	0	999	200000	888	999	888	999	999	1	1	1	1	24	1
246	38	1	90	1	0	0	0	1	0	0	999	0	1	0	0	0	0	888	1	0	0	999	1
247	83	2	100	0	1	1	1	0	0	0	1570	999	2	0	1	0	0	0	0	0	999	999	0
248	67	1	100	3	1	0	1	0	0	0	999	999	0	0	0	0	0	0	0	1	888	888	888
249	21	2	100	1	0	1	0	0	0	0	999	999	1	0	0	0	0	0	0	0	0	6	999
250	32	1	70	2	1	1	0	0	0	0	999	999	2	0	1	0	0	1	1	0	0	14	1
251	67	1	70	1	0	0	0	1	0	0	999	999	2	0	1	0	0	0	0	0	0	6	999
252	53	2	75	3	1	0	1	0	0	1	9.2	999	2	0	1	0	0	0	999	999	999	3	888
253	46	2	160	1	0	0	0	0	0	0	999	9	2	0	1	0	0	0	0	0	0	32	1
254	27	2	100	2	0	1	0	0	0	999	0	999	1	0	0	0	0	1	1	1	0	999	1
255	49	0	0	0	0	1	0	0	0	999	999	999	2	0	1	1	0	1	1	1	999	999	1
256	49	1	50	2	1	1	0	0	0	999	999	120	1	0	0	0	0	1	1	1	1	30	1
257	22	2	170	1	1	1	0	0	0	0	1	999	1	0	0	0	0	1	1	0	0	999	1
258	37	2	80	1	0	1	0	0	0	0	0	0	0	0	0	0	1	1	1	1	0	7	1
259	77	1	85	24	1	0	0	0	0	0	73	0	2	0	1	0	0	0	0	999	0	7	1
260	53	1	60	1	0	1	0	0	0	0	16	0	2	0	1	0	0	1	1	0	0	12	1
261	53	1	190	1	0	1	0	0	0	999	0	999	2	0	0	1	0	0	0	0	999	999	1
262	51	1	81	1	0	1	0	0	0	999	413	999	2	0	1	1	1	0	0	0	0	24	1
263	32	2	0	1	999	999	999	999	999	999	999	999	1	0	0	0	0	1	1	0	999	999	1
264	64	1	0	2	999	999	999	999	999	999	999	999	1	0	0	0	0	1	1	0	999	999	999
265	57	2	0	1	999	999	999	999	999	999	999	999	1	0	0	0	0	1	1	0	999	999	999
266	49	0	0	25	1	0	0	0	0	999	999	38242	888	999	999	999	999	0	0	1	0	9	1
267	38	1	0	2	1	0	0	0	0	0	999	0	1	0	0	0	0	1	1	1	0	36	1
268	66	1	120	26	0	1	0	1	0	0	0	0	2	0	1	0	0	0	0	0	0	25	1
269	40	1	31	1	0	0	0	0	0	0	0	0	2	0	1	1	1	0	0	1	1	12	1
270	47	2	120	1	0	1	0	0	0	0	999	999	2	0	1	0	0	1	1	0	0	36	1
271	49	1	70	3	0	0	0	0	0	0	111	0	2	0	1	1	1	1	1	0	0	36	1
272	67	1	55	1	999	999	999	999	999	999	28.2	999	2	0	1	1	1	1	1	1	0	60	1
273	49	1	0	1	0	1	0	0	0	0	999	999	2	0	0	0	0	1	0	999	0	999	1
274	42	2	89	1	0	1	0	0	0	0	15	3.3	1	0	0	0	0	1	1	0	0	6	0
275	64	2	120	27	1	1	0	0	0	1	999	132.7	2	0	1	1	1	1	1	1	0	48	1
276	36	1	50	1	1	1	0	0	0	1	999	999	1	0	0	1	0	1	1	0	0	12	1
277	30	2	85	1	0	1	0	0	0	0	999	0	1	0	0	0	0	1	1	0	0	888	1
278	43	1	80	1	0	0	0	0	0	0	17.9	0	1	0	0	0	0	0	1	0	0	48	1
279	36	2	100	3	0	0	0	0	0	0	999	1000	888	0	1	1	1	1	1	1	999	999	1
280	38	2	52	2	1	0	0	0	0	0	999	177	999	0	0	0	0	1	1	1	1		1
281	30	1	75	1	0	1	0	0	0	0	999	83.5	1	0	0	0	0	1	1	1	1	9	1
282	66	2	25	1	0	0	0	0	0	0	0	500	2	0	1	1	0	0	0	0	0	3	1
283	25	2	90	1	1	0	0	0	0	999	999	999	0	0	0	0	1	1	1	999	0	108	999
284	0	0	70	3	0	0	0	0	0	999	999	999	1	0	0	0	0	1	1	1	999	888	999
285	19	2	68	1	999	999	999	999	999	0	999	999	1	0	0	0	0	1	1	1	0	108	1
286	32	1	60	1	0	0	0	0	0	0	999	108.5	2	0	0	1	1	1	1	1	1	12	1
287	31	2	68	2	0	0	0	0	0	1	999	996	1	0	0	0	0	1	1	1	0	6	999
288	17	1	150	3	0	0	0	1	0	0	17.3	300	1	0	0	0	0	1	1	0	0	48	1
289	50	2	85	1	1	1	0	0	0	999	999	999	999	0	1	1	0	1	1	999	0	45	1
290	75	2	140	2	1	0	0	0	0	0	999	0	2	0	1	0	0	0	0	999	0	6	1

## Sheet: Sheet2
in recurrent malignant struma ovarii
